# Supplementary material for: A novel two-dimensional material B2S3and its structural implication to new carbon and boron nitride allotropes
Source: Royal Society of Chemistry journal article supplement (doi:10.1039/c5tc01079a), 2015-01-01
Supplement: c5tc01079a1.pdf [file c5tc01079a1.pdf]

## Supplementary Information

### **A novel two-dimensional material B<sub>2</sub>S<sub>3</sub> and its structural implication to new carbon and boron nitride allotropes**

Wei Liu,<sup>a</sup> Maosheng Miao<sup>\*bc</sup> and Jing-yao Liu<sup>\*a</sup>

<sup>a</sup> Institute of Theoretical Chemistry, Jilin University, Changchun, 130023, P. R. China, E-mail: l jy121@jlu.edu.cn; Tel: 86-431-88498016

<sup>b</sup> Department of Chemistry & Biochemistry, California State University, Northridge, CA, 91330, USA, E-mail: mmiao@csun.edu

<sup>c</sup> Beijing Computational Science Research Center, Beijing, 100094, P. R. China

\*Corresponding author: mmiao@csun.edu; l jy121@jlu.edu.cn

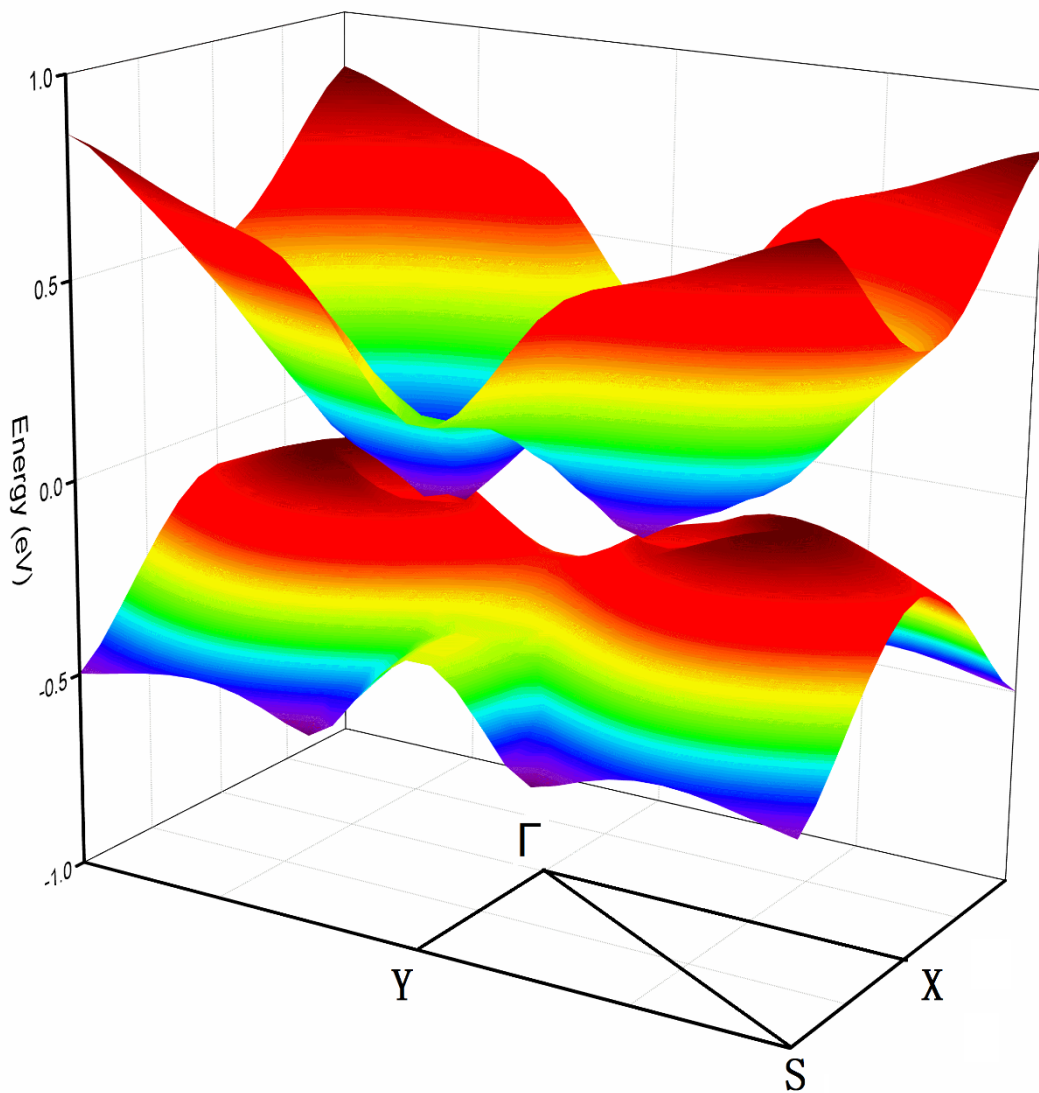

**Figure S1.** 3D band structure of r-graphene.
